# Supplementary material
Source: Springer Nature journal article supplement (https://www.springermedizin.de/resource/supplementary/12883_2013_939_MOESM2_ESM.pdf/9456386)
Supplement: MOESM2 [file 9456386]

**Patients Initiating GA**

n = 7,386

**Remained on GA  
for entire analysis  
period**

n = 1,820 (24.6%)

**Gap in Therapy**

n = 5,130  
(69.5%)

**Switched  
Therapies**

n = 194 (2.6%)

**Combination  
of GA and  
Other Therapy**

n = 242 (3.3%)

**Re-initiated GA**

n = 3,854  
(75.1%)

**Combination  
of GA and  
Other Therapy**

n = 29 (0.6%)

**Switched  
Therapies**

n = 268 (5.2%)

**Stopped All  
Therapy**

n = 979  
(19.1%)
